# Supplementary material
Source: PubMed Central journal article supplement (PMC3755489)
Supplement: NIHMS489924-supplement-Supplemental_Table_1.pdf [file NIHMS489924-supplement-Supplemental_Table_1.pdf]

## Regulatory polymorphisms in *CYP2C19* affecting hepatic expression

Jonathan C Sanford, Yingying Guo, Wolfgang Sadee, Danxin Wang

**Supplemental Table 1:** Primer Sequences and PCR conditions for PCR amplifications for sequencing, quantitation, genotyping and SNAPSHOT.

Primers are presented with the use, name and sequence.

Run conditions are presented in order of

(Annealing temp)PCR(HS = Hotstart)(# of Cycles if >30)

Extension times are 1 minute unless otherwise specified.

| <b>CYP2C19 Master Primer List</b>                                        |
|--------------------------------------------------------------------------|
| <b>1. CYP2C19 Promoter and Exonic regions for Ion Torrent Sequencing</b> |
| <i>Promoter ~-4KB to -2KB</i>                                            |
| 63.5PCRHS, 2 min 30 sec extension                                        |
| 2C192kbTL1F1, GACCGGAGCTGTTCGTATTTGGC                                    |
| 2C19P2kbTL1R1, TTGACTAGATTGGGGGTCAGAAGAGTTTG                             |
|                                                                          |
| <i>Promoter -2KB to start of Exon 1</i>                                  |
| 63.5PCRHS, 2 min 30 sec extension                                        |
| 2C19P2kbTL2F2, CATTGTGATACTTTGTCTCACTGAGTCA                              |
| 2C19P2kbTL2R2, CTTACATTGGTTAAGGATTTGCTGACA                               |
|                                                                          |
| <i>***Promoter -3KB to Exon 1</i>                                        |
| 63.5PCRHS_35                                                             |
| 2C19_3kbP_to_Ex1_F, TTATTTGTTGCTAGGGCTCGTG                               |
| 2C19_3kbP_to_Ex1_R, CTTACTGTTTACCCTCAGCC                                 |
|                                                                          |
| <i>***Exon 2 to Exon 3</i>                                               |
| 60PCRHS                                                                  |
| 2C19_Ex2_to_Ex3_F, AGGTAGACACAAGAGTGCTGA                                 |
| 2C19_Ex2_to_Ex3_R, TTCTCTGGTGACATGTTCTGGA                                |
|                                                                          |
| <i>***Exon 4 to Exon 5</i>                                               |
| 60PCRHS_35                                                               |
| 2C19_Ex4_to_Ex5_F, CCATTATTTAACCAGCTAGGC                                 |
| 2C19_Ex4_to_Ex5_R, TCCTATCCTGACATCCTTATTG                                |
|                                                                          |
| <i>Exon 6</i>                                                            |
| 60PCRHS                                                                  |
| 2C19 I5F1, GACAAACCCACAGCCAATATCATACT                                    |
| 2C19 I6R1, GGGACAGATTACAGCTGCGG                                          |
|                                                                          |

|                                                      |
|------------------------------------------------------|
|                                                      |
| <i>Exon 7</i>                                        |
| 60PCRHS                                              |
| 2C19_Ex7_F, AATGCTGAAGTGGGTTGTTG                     |
| 2C19_Ex7_R, ACCCTGACAGAAATTCTAGCCC                   |
|                                                      |
| <i>Exon 8</i>                                        |
| 64.1PCRHS, requires gel purification of ~951 bp band |
| CYP2C19I7F1, GTGCTGCACCCATTAACATC                    |
| CYP2C19I8R1, TTTCCAAACACAGAAGTGAGCCTC                |
|                                                      |
| <i>Exon 9</i>                                        |
| 59.3PCRHS                                            |
| CYP2C19I8F1, CCATCCATTCATCCATTAATCCT                 |
| CYP2C19I3UPR1, CATTATGTGGCACTCAATGTAACCTATTAT        |
|                                                      |
| *** From Blaisdell J, et al.(39)                     |
|                                                      |
|                                                      |
|                                                      |
| <b>2. Quantitation Primers</b>                       |
|                                                      |
| GATA4QF, AGCCTGGCCTGTCATCTCACTA                      |
| GATA4QR, GACATCGCACTGACTGAGAACGT                     |
|                                                      |
| CARquan-F, CACATGGGCACCATGTTTGA                      |
| CARquan-R, AAGGGCTGGTGATGGATGAA                      |
|                                                      |
| RXRA-F, GAGCGGCAGCGTGGCAAGG                          |
| RXRA-R, GGCAAATGTTGGTGACAGGG                         |
|                                                      |
| PXRquan-F, CAAGCGGAAGAAAAGTGAACG                     |
| PXRquan-R, CACAGATCTTTCCGGACCTG                      |
|                                                      |
| HNF4A1A-F, ACATGGACATGGCCGACTAC                      |
| HNF4A1A-R, CTCGAGGCACCGTAGTGTTT                      |
|                                                      |
| GAPDHquan-F1, ACTCCTCCACCTTTGACGCT                   |
| GAPDHquan-R1, GGTCCACCACCTGTTGC                      |
|                                                      |
| CYP2C19_E8F2, GTCACCTTCTGGATGAAGGTGTA                |
| CYP2C19_E9_R, AGGTCCTTTGGGTCAATCAGAG                 |
|                                                      |
|                                                      |
| <b>3.SNaPshot/Genotype primers</b>                   |
|                                                      |
| <i>rs12248560(CYP2C19*17)</i>                        |

|                                                                         |
|-------------------------------------------------------------------------|
| 60PCRHS                                                                 |
| 2C19 Promoter F1, GCCCTTAGCACCAAATTCTCTG                                |
| 2C19 Promoter R1, AACACCTTTACCATTTAACCCC                                |
| CYP2C19_rs560_PEF, CAAATTTGTGTCTTCTGTTCTCAAAG                           |
|                                                                         |
| <i>rs4244285 (CYP2C19*2)</i>                                            |
| 60PCR                                                                   |
| CYP2C19Int4F, ATCTTATATTTCAAGATTGTAGAGAAGAATTGTTG                       |
| CYP2C19int5R, CATCCGTAGTAAACACAAAAGTAGTCAATG                            |
| 2C19rs285PEFT10, T(10)CCCACTATCATTGATTATTTCCC                           |
|                                                                         |
| <i>rs17885098 (marker SNP)</i>                                          |
| 60PCRHS                                                                 |
| 2C19 E1DNA-R1, CTTACATTGGTTAAGGATTTGCTGACA                              |
| 2C19 E1RNA-R1, AGAGATTGGTTAAGGATTTGCTGACA                               |
| 2C10 rs098PER2, ATTTCCAATCACTGGGAGAGGAGT                                |
|                                                                         |
| <i>rs4986894(-98T&gt;C)</i>                                             |
| 60PCRHS                                                                 |
| F Primer, [6FAM]TGCATTGGAACCACTTGGGTTA                                  |
| R Primer, CCTACATTGGTTAAGGATTTGCTGACA                                   |
| Cut with BtsCI at 50C in Buffer 4 (New England Biosciences, Ipswich MA) |
|                                                                         |
| <i>rs4986893(2C19*3)</i>                                                |
| 60PCRHS                                                                 |
| F Primer, GAATGAAAACATCAGGATTGTAAGCAC                                   |
| R Primer, GGATTTCCAGAAAAAAGACTGT                                        |
| Primer Extension R, CAAAAACTTGGCCTTACCTGGAT                             |
|                                                                         |
|                                                                         |
| <b>4. Sanger sequencing primers for promoter region</b>                 |
|                                                                         |
| 2C19P7F1, CGGAGCTGTTCGTATTTGGC                                          |
| 2C19P7F2, AATAAGATGACAAGACACAGACTGGGA                                   |
| 2C19P7F3, AGAAATGAACTATCAAGCCATGAAAAGA                                  |
| 2C19P7F4, CATTGTGATACTTTGTCTCACTGAGTCA                                  |
| 2C19P7F5, CCTCATTCTGAGATGGGTCAAT                                        |
| 2C19P7F6, GTGGTTCTATTTAATGTGAAGCCTGTT                                   |
| 2C19P7F7, TTAGCTATTTTCATGTTTAGGCTGCTGTAT                                |
