# Supplementary material
Source: PubMed Central journal article supplement (PMC3755489)
Supplement: NIHMS489924-supplement-Supplemental_Table_2.pdf [file NIHMS489924-supplement-Supplemental_Table_2.pdf]

Regulatory polymorphisms in *CYP2C19* affecting hepatic expression

Jonathan C Sanford, Yingying Guo, Wolfgang Sadee, Danxin Wang

**Supplemental Table 2: Hardy Weinberg Equilibrium for SNPs genotyped in all samples**

SNP linkage disequilibrium data from 1K Genomes Project can be viewed in Supplemental Figure 1.

Significant P values indicate that a SNP does not fit into HWE.

For rs 17885098 minor allele frequency ranges from 0.083 in Caucasians to as high as 0.180 in Africans depending on the cohort, so MAF may be variable especially in a heterogenous cohort.

SNPs presented are \*17(rs12248560), \*2(rs4244285), marker SNP (rs17885098), rs4986894 (-98T>C)

|            | Minor Allele | Minor Allele Frequency | Major Allele | Major Allele Frequency | HWE-P    | LOG10 HWE P |
|------------|--------------|------------------------|--------------|------------------------|----------|-------------|
| rs17885098 | G            | 0.128                  | A            | 0.872                  | 2.20E-08 | 7.658       |
| rs4244285  | A            | 0.174                  | G            | 0.826                  | 0.576    | 0.239       |
| rs4986894  | C            | 0.149                  | T            | 0.851                  | 0.72     | 0.143       |
| rs12248560 | T            | 0.26                   | C            | 0.74                   | 0.856    | 0.068       |
