# Supplementary material
Source: PubMed Central journal article supplement (PMC3755489)
Supplement: NIHMS489924-supplement-Supplemental_Table_3.pdf [file NIHMS489924-supplement-Supplemental_Table_3.pdf]

Regulatory polymorphisms in *CYP2C19* affecting hepatic expression  
Jonathan C Sanford, Yingying Guo, Wolfgang Sadee, Danxin Wang

**Supplemental Table 3:** Ion Torrent Sequencing SNP calls

(A) SNPs called with minimum 20 reads and 30% allele frequency. Color coded legend indicates comparisons between L114 (AEI-) and LL16, LL19 (AEI+)  
Reference Sequence: NG\_008384

Likely Artifact- Indicated by generally lower coverage compared to other areas of the genome. Also non unique to AEI+ subjects

Unique Regulatory Region SNP

Present in AEI- negative

Potentially part of *CYP2C19\*20(CYP2C19\*3B)* haplotype, however L123 did not contain the functional SNP (rs4986893)

Unique to AEI positive samples but not consistently present in other \*17 carriers namely LL48 (\*17/\*17) and LL44 (VMAX outlier)

In high LD with rs12248560  $r^2=1$ ,  $D'=1$  in CEU (1K Genomes)

No indication in change of splicing in humans (<http://regna.mbc.nctu.edu.tw/html/prediction.html>)

or polyA (<http://www.imtech.res.in/raghava/polyapred/submission.html>)

| <b>L114</b> | AEI-               |                |           |          |            |             |         |          |
|-------------|--------------------|----------------|-----------|----------|------------|-------------|---------|----------|
| rs#         | Reference Position | Variation Type | Reference | Variants | Allele Var | Frequencies | Counts  | Coverage |
| rs74152364  | 1243               | SNP            | C         | 2        | T/C        | 53.7/46.2   | 378/325 | 704      |
| rs78721914  | 1382               | SNP            | A         | 2        | A/G        | 58.6/41.4   | 284/201 | 485      |
| rs78742448  | 1670               | SNP            | C         | 2        | C/T        | 60.1/39.1   | 309/201 | 514      |
| rs78535200  | 1672               | SNP            | G         | 2        | G/T        | 57.7/41.6   | 297/214 | 515      |
| rs4532967   | 1735               | SNP            | G         | 2        | T/G        | 51.1/48.6   | 334/318 | 654      |
| rs77046614  | 1782               | SNP            | T         | 2        | T/G        | 51.7/48.2   | 344/321 | 666      |
| rs77957608  | 2229               | SNP            | G         | 2        | G/A        | 57.3/42.7   | 519/387 | 906      |
| rs77850210  | 2281               | SNP            | T         | 2        | C/T        | 58.0/41.9   | 568/411 | 980      |
| rs3814637   | 3583               | SNP            | C         | 2        | C/T        | 51.7/47.7   | 169/156 | 327      |
| rs11568732  | 4112               | SNP            | T         | 2        | G/T        | 50.0/49.8   | 230/229 | 460      |
| no rs#      | 4334               | SNP            | A         | 2        | A/T        | 68.9/31.1   | 93/42   | 135      |
| rs4986894   | 4903               | SNP            | T         | 2        | T/C        | 50.8/48.9   | 190/183 | 374      |
| rs17885098  | 5099               | SNP            | C         | 2        | T/C        | 60.8/38.4   | 371/234 | 610      |
| rs17884832  | 17013              | SNP            | T         | 2        | T/G        | 58.8/40.8   | 144/100 | 245      |
| rs7916649   | 17122              | SNP            | G         | 1        | A          | 100         | 267     | 267      |
| rs17878459  | 17460              | SNP            | G         | 2        | C/G        | 51.9/48.1   | 94/87   | 181      |
| rs12769205  | 17662              | SNP            | A         | 2        | G/A        | 50.0/48.4   | 92/89   | 184      |
| rs17879992  | 18166              | SNP            | T         | 2        | T/C        | 61.3/38.7   | 119/75  | 194      |
| no rs#      | 84698              | SNP            | T         | 2        | T/A        | 65.0/30.0   | 13/6    | 20       |
| rs28399513  | 84936              | SNP            | T         | 2        | T/A        | 55.7/43.6   | 83/65   | 149      |
| rs3758580   | 85160              | SNP            | C         | 2        | C/T        | 52.0/47.1   | 115/104 | 221      |
| rs3758581   | 85161              | SNP            | A         | 2        | A/G        | 51.8/48.2   | 114/106 | 220      |
| rs17885052  | 92620              | SNP            | A         | 2        | A/T        | 55.8/43.7   | 226/177 | 405      |
| no rs#      | 92745              | SNP            | G         | 2        | G/T        | 68.6/31.4   | 131/60  | 191      |

| LL16       | AEI+               |                |           |          |             |             |           |          |
|------------|--------------------|----------------|-----------|----------|-------------|-------------|-----------|----------|
| rs#        | Reference Position | Variation Type | Reference | Variants | Allele Vari | Frequencies | Counts    | Coverage |
| rs74152364 | 1243               | SNP            | C         | 2        | T/C         | 55.3/44.4   | 264/212   | 477      |
| rs78721914 | 1382               | SNP            | A         | 2        | A/G         | 50.6/48.8   | 173/167   | 342      |
| rs11188072 | 1599               | SNP            | C         | 2        | T/C         | 53.4/46.6   | 254/222   | 476      |
| rs78742448 | 1670               | SNP            | C         | 2        | T/C         | 51.1/48.3   | 250/236   | 489      |
| rs78535200 | 1672               | SNP            | G         | 2        | G/T         | 50.0/48.9   | 232/227   | 464      |
| rs77046614 | 1782               | SNP            | T         | 2        | G/T         | 54.0/45.7   | 339/287   | 628      |
| rs77957608 | 2229               | SNP            | G         | 2        | G/A         | 51.8/48.2   | 393/365   | 758      |
| rs77850210 | 2281               | SNP            | T         | 2        | C/T         | 60.0/39.9   | 512/341   | 854      |
| rs3814637  | 3583               | SNP            | C         | 2        | T/C         | 51.9/48.0   | 407/376   | 784      |
| rs11568732 | 4112               | SNP            | T         | 2        | T/G         | 51.3/48.6   | 520/493   | 1014     |
| rs12248560 | 4195               | SNP            | C         | 2        | C/T         | 51.9/48.1   | 694/644   | 1338     |
| rs17885098 | 5099               | SNP            | C         | 2        | T/C         | 59.7/39.1   | 863/566   | 1446     |
| rs17884832 | 17013              | SNP            | T         | 2        | T/G         | 55.8/44.1   | 449/355   | 805      |
| rs7916649  | 17122              | SNP            | G         | 1        | A           | 99.8        | 889       | 891      |
| rs17879992 | 18166              | SNP            | T         | 2        | T/C         | 55.5/44.5   | 267/214   | 481      |
| rs4304697  | 23427              | SNP            | G         | 2        | A/G         | 63.0/36.6   | 153/89    | 243      |
| rs7088784  | 23911              | SNP            | A         | 2        | A/G         | 62.1/37.0   | 131/78    | 211      |
| rs55732648 | 62602              | SNP            | A         | 2        | T/A         | 52.5/47.3   | 3371/3038 | 6419     |
| rs28399511 | 62678              | SNP            | T         | 2        | G/T         | 51.4/48.4   | 3434/3231 | 6680     |
| rs3758581  | 85161              | SNP            | A         | 2        | G/A         | 56.8/43.2   | 336/256   | 592      |
| rs17885052 | 92620              | SNP            | A         | 2        | A/T         | 57.4/42.6   | 179/133   | 312      |
| no rs#     | 92745              | SNP            | G         | 2        | G/T         | 64.5/35.5   | 80/44     | 124      |
| rs12268020 | 94909              | SNP            | C         | 2        | C/T         | 53.8/46.2   | 56/48     | 104      |

| LL19       | AEI+               |                |           |          |             |             |           |          |
|------------|--------------------|----------------|-----------|----------|-------------|-------------|-----------|----------|
| rs#        | Reference Position | Variation Type | Reference | Variants | Allele Vari | Frequencies | Counts    | Coverage |
| rs74152364 | 1243               | SNP            | C         | 2        | T/C         | 53.3/46.4   | 517/450   | 970      |
| rs78721914 | 1382               | SNP            | A         | 2        | A/G         | 53.8/45.6   | 364/309   | 677      |
| rs11188072 | 1599               | SNP            | C         | 2        | T/C         | 50.7/49.3   | 356/346   | 702      |
| rs78742448 | 1670               | SNP            | C         | 2        | C/T         | 50.5/49.2   | 316/308   | 626      |
| rs78535200 | 1672               | SNP            | G         | 2        | G/T         | 49.3/49.3   | 303/303   | 614      |
| rs77046614 | 1782               | SNP            | T         | 2        | G/T         | 51.1/48.8   | 418/399   | 818      |
| rs77957608 | 2229               | SNP            | G         | 2        | G/A         | 57.4/42.6   | 1354/1005 | 2359     |
| rs77850210 | 2281               | SNP            | T         | 2        | C/T         | 58.0/41.7   | 1551/1116 | 2674     |
| rs3814637  | 3583               | SNP            | C         | 2        | C/T         | 55.7/44.1   | 642/508   | 1152     |
| rs11568732 | 4112               | SNP            | T         | 2        | T/G         | 54.9/45.0   | 766/628   | 1396     |
| rs12248560 | 4195               | SNP            | C         | 2        | T/C         | 53.6/46.4   | 1085/941  | 2026     |
| no rs#     | 4334               | SNP            | A         | 2        | A/T         | 67.5/32.3   | 388/186   | 575      |
| rs17885098 | 5099               | SNP            | C         | 2        | T/C         | 61.8/37.0   | 1123/672  | 1817     |
| rs17884832 | 17013              | SNP            | T         | 2        | T/G         | 55.0/45.0   | 403/330   | 733      |
| rs7916649  | 17122              | SNP            | G         | 1        | A           | 99.4        | 821       | 826      |
| rs17879992 | 18166              | SNP            | T         | 2        | T/C         | 54.2/45.8   | 313/265   | 578      |
| rs55732648 | 62602              | SNP            | A         | 2        | T/A         | 52.5/47.3   | 2326/2096 | 4429     |
| rs28399511 | 62678              | SNP            | T         | 2        | G/T         | 51.4/48.4   | 2426/2281 | 4717     |
| rs3758581  | 85161              | SNP            | A         | 2        | G/A         | 53.1/46.6   | 554/487   | 1044     |
| rs17885052 | 92620              | SNP            | A         | 2        | A/T         | 54.1/45.7   | 218/184   | 403      |
| rs12268020 | 94909              | SNP            | C         | 2        | T/C         | 51.6/48.4   | 49/46     | 95       |

| <b>L123</b> | AEI+               | African American |           |          |             |             |        |          |
|-------------|--------------------|------------------|-----------|----------|-------------|-------------|--------|----------|
|             | Reference Position | Variation Type   | Reference | Variants | Allele Vari | Frequencies | Counts | Coverage |
| rs7919698   | 497                | SNP              | A         | 2        | G/A         | 63.6/36.4   | 21/12  | 33       |
| rs74152364  | 1243               | SNP              | C         | 2        | C/T         | 55.8/44.2   | 24/19  | 43       |
| rs78721914  | 1382               | SNP              | A         | 2        | A/G         | 61.8/38.2   | 63/39  | 102      |
| rs7101258   | 1669               | SNP              | A         | 2        | A/C         | 56.2/43.8   | 36/28  | 64       |
| rs3814637   | 3583               | SNP              | C         | 2        | C/T         | 56.3/43.7   | 49/38  | 87       |
| rs11568730  | 3610               | SNP              | T         | 2        | T/G         | 53.9/46.1   | 41/35  | 76       |
| rs11568732  | 4112               | SNP              | T         | 2        | T/G         | 62.7/37.3   | 74/44  | 118      |
| rs17885098  | 5099               | SNP              | C         | 2        | T/C         | 51.8/48.2   | 43/40  | 83       |
| rs7916649   | 17122              | SNP              | G         | 2        | A/G         | 63.5/36.5   | 33/19  | 52       |
| rs17878649  | 17306              | SNP              | G         | 2        | A/G         | 51.4/48.6   | 37/35  | 72       |
| rs17879992  | 18166              | SNP              | T         | 2        | C/T         | 58.3/41.7   | 81/58  | 139      |
| rs4304697   | 23427              | SNP              | G         | 1        | A           | 73.2        | 30     | 41       |
| rs7088784   | 23911              | SNP              | A         | 2        | A/G         | 63.8/36.2   | 37/21  | 58       |
| rs56043006  | 62638              | SNP              | C         | 2        | A/C         | 53.8/46.2   | 78/67  | 145      |

**(B)** LL44 and LL48 SNP calling used the same constraints as Supplemental Table 3A.

Additional control samples SNPs were called with minimum of 10 reads and 20 % per allele

Colored legend indicates comparison between outlier LL44 and control samples, including haplotype information from <http://www.cypalleles.ki.se/cyp2c19.htm>

Reference Sequence: NG\_008384

Known SNP in \*2 Haplotypes

Present in control Vmax subjects

Likely heterozygote, heterozygosity confirmed by SNAPSHoT

| LL44       | *2/*17 Outlier     |                |           |          |             |             |           |          |
|------------|--------------------|----------------|-----------|----------|-------------|-------------|-----------|----------|
|            | Reference Position | Variation Type | Reference | Variants | Allele Vari | Frequencies | Counts    | Coverage |
| rs11188072 | 1599               | SNP            | C         | 2        | T/C         | 51.9/48.1   | 208/193   | 401      |
| rs4532967  | 1735               | SNP            | G         | 2        | T/G         | 52.2/47.5   | 211/192   | 404      |
| rs12248560 | 4195               | SNP            | C         | 2        | C/T         | 62.1/37.9   | 36/22     | 58       |
| rs4986894  | 4903               | SNP            | T         | 1        | C           | 76.8        | 43        | 56       |
| rs17885098 | 5099               | SNP            | C         | 1        | T           | 98.2        | 54        | 55       |
| rs7916649  | 17122              | SNP            | G         | 1        | A           | 99.8        | 409       | 410      |
| rs17878459 | 17460              | SNP            | G         | 2        | G/C         | 53.5/46.1   | 130/112   | 243      |
| rs12769205 | 17662              | SNP            | A         | 2        | A/G         | 57.7/41.4   | 138/99    | 239      |
| rs4244285  | 24154              | SNP            | G         | 2        | A/G         | 57.6/42.4   | 178/131   | 309      |
| rs12571421 | 24520              | SNP            | A         | 2        | G/A         | 55.3/44.7   | 378/305   | 683      |
| rs4417205  | 62740              | SNP            | C         | 2        | G/C         | 50.0/49.9   | 1223/1219 | 2444     |
| rs28399513 | 84936              | SNP            | T         | 2        | T/A         | 51.4/48.6   | 112/106   | 218      |
| rs3758580  | 85160              | SNP            | C         | 2        | T/C         | 51.1/48.9   | 158/151   | 309      |
| rs3758581  | 85161              | SNP            | A         | 1        | G           | 98.7        | 306       | 310      |
| rs12268020 | 94909              | SNP            | C         | 2        | T/C         | 54.9/45.1   | 157/129   | 286      |

| LL1        | *2/*17             |                |           |          |             |             |        |          |
|------------|--------------------|----------------|-----------|----------|-------------|-------------|--------|----------|
|            | Reference Position | Variation Type | Reference | Variants | Allele Vari | Frequencies | Counts | Coverage |
| rs11188072 | 1599               | SNP            | C         | 2        | T/C         | 60.0/40.0   | 9_6    | 15       |
| rs4532967  | 1735               | SNP            | G         | 2        | G/T         | 52.6/47.4   | 10_9   | 19       |
| rs12248560 | 4195               | SNP            | C         | 2        | C/T         | 56.0/44.0   | 65/51  | 116      |
| rs4986894  | 4903               | SNP            | T         | 2        | T/C         | 52.5/45.5   | 53/46  | 101      |
| rs17885098 | 5099               | SNP            | C         | 1        | T           | 99          | 102    | 103      |
| rs7916649  | 17122              | SNP            | G         | 1        | A           | 100         | 30     | 30       |
| rs12769205 | 17662              | SNP            | A         | 2        | A/G         | 60.0/40.0   | 12_8   | 20       |
| rs4244285  | 24154              | SNP            | G         | 2        | A/G         | 50.0/50.0   | 13/13  | 26       |
| rs12571421 | 24520              | SNP            | A         | 2        | A/G         | 58.0/42.0   | 51/37  | 88       |
| no rs#     | 62664              | SNP            | T         | 2        | T/A         | 62.5/37.5   | 10_6   | 16       |
| rs4417205  | 62740              | SNP            | C         | 2        | C/G         | 51.9/48.1   | 27/25  | 52       |
| rs28399513 | 84936              | SNP            | T         | 2        | T/A         | 54.1/45.9   | 20/17  | 37       |
| rs3758580  | 85160              | SNP            | C         | 2        | C/T         | 65.6/34.4   | 21/11  | 32       |
| rs3758581  | 85161              | SNP            | A         | 1        | G           | 97.1        | 34     | 35       |

| LL11        | *2/*17             |                |           |          |             |             |        |          |
|-------------|--------------------|----------------|-----------|----------|-------------|-------------|--------|----------|
|             | Reference Position | Variation Type | Reference | Variants | Allele Vari | Frequencies | Counts | Coverage |
| rs115939780 | 865                | SNP            | C         | 2        | C/T         | 80.0/20.0   | 8_2    | 10       |
| rs12248560  | 4195               | SNP            | C         | 2        | C/T         | 50.9/49.1   | 27/26  | 53       |
| rs4986894   | 4903               | SNP            | T         | 2        | C/T         | 55.6/44.4   | 20/16  | 36       |
| rs17885098  | 5099               | SNP            | C         | 1        | T           | 100         | 45     | 45       |
| rs7916649   | 17122              | SNP            | G         | 1        | A           | 97.1        | 33     | 34       |
| rs17878459  | 17460              | SNP            | G         | 2        | C/G         | 56.8/43.2   | 21/16  | 37       |
| rs12769205  | 17662              | SNP            | A         | 2        | G/A         | 63.0/37.0   | 17/10  | 27       |
| no rs#      | 23453              | SNP            | G         | 2        | G/A         | 71.4/28.6   | 15/6   | 21       |
| rs4244285   | 24154              | SNP            | G         | 2        | A/G         | 56.0/44.0   | 14/11  | 25       |
| rs12571421  | 24520              | SNP            | A         | 2        | A/G         | 54.0/46.0   | 27/23  | 50       |
| rs4417205   | 62740              | SNP            | C         | 2        | C/G         | 53.8/46.2   | 28/24  | 52       |

| LL13       | *2/*17             |                |           |          |             |             |        |          |
|------------|--------------------|----------------|-----------|----------|-------------|-------------|--------|----------|
|            | Reference Position | Variation Type | Reference | Variants | Allele Vari | Frequencies | Counts | Coverage |
| rs12248560 | 4195               | SNP            | C         | 2        | C/T         | 51.4/48.6   | 36/34  | 70       |
| rs4986894  | 4903               | SNP            | T         | 2        | T/C         | 53.1/46.9   | 26/23  | 49       |
| rs17885098 | 5099               | SNP            | C         | 1        | T           | 100         | 74     | 74       |
| rs17878459 | 17460              | SNP            | G         | 2        | G/C         | 54.5/36.4   | 6_4    | 11       |
| no rs#     | 17981              | SNP            | A         | 2        | A/G         | 80.0/20.0   | 8_2    | 10       |
| rs4244285  | 24154              | SNP            | G         | 2        | A/G         | 50.0/50.0   | 7_7    | 14       |
| rs12571421 | 24520              | SNP            | A         | 2        | A/G         | 63.6/36.4   | 21/12  | 33       |
| rs4417205  | 62740              | SNP            | C         | 2        | G/C         | 58.3/41.7   | 5_7    | 12       |

| LL45       | *17/*17            |                |           |          |             |             |        |          |
|------------|--------------------|----------------|-----------|----------|-------------|-------------|--------|----------|
|            | Reference Position | Variation Type | Reference | Variants | Allele Vari | Frequencies | Counts | Coverage |
| rs11188072 | 1599               | SNP            | C         | 1        | T           | 100         | 11     | 11       |
| rs12248560 | 4195               | SNP            | C         | 1        | T           | 100         | 93     | 93       |
| rs17885098 | 5099               | SNP            | C         | 1        | T           | 94          | 78     | 83       |
| rs7916649  | 17122              | SNP            | G         | 1        | A           | 100         | 31     | 31       |
| No rs#     | 62664              | SNP            | T         | 2        | T/A         | 70.8/29.2   | 17/7   | 24       |
| rs3758581  | 85161              | SNP            | A         | 1        | G           | 95.2        | 20     | 21       |
| rs12268020 | 94909              | SNP            | C         | 1        | T           | 100         | 16     | 16       |

| LL46       | *17/*17            |                |           |          |             |             |        |          |
|------------|--------------------|----------------|-----------|----------|-------------|-------------|--------|----------|
|            | Reference Position | Variation Type | Reference | Variants | Allele Vari | Frequencies | Counts | Coverage |
| rs12248560 | 4125               | SNP            | T         | 2        | T/C         | 76.9/23.1   | 10_3   | 13       |
| rs17885098 | 4195               | SNP            | C         | 1        | T           | 100         | 39     | 39       |
| rs17885098 | 5099               | SNP            | C         | 1        | T           | 98.1        | 52     | 53       |
| no rs#     | 18133              | SNP            | T         | 2        | T/C         | 70.0/30.0   | 7_3    | 10       |
| no rs#     | 62664              | SNP            | T         | 2        | T/A         | 70.0/30.0   | 7_3    | 10       |
| rs3758581  | 85161              | SNP            | A         | 1        | G           | 100         | 11     | 11       |



| <b>LL47</b> | <b>*1/*2</b>       |                |           |          |             |             |        |          |
|-------------|--------------------|----------------|-----------|----------|-------------|-------------|--------|----------|
|             | Reference Position | Variation Type | Reference | Variants | Allele Vari | Frequencies | Counts | Coverage |
| #N/A        | 1343               | SNP            | G         | 2        | G/A         | 80.0/20.0   | 8_2    | 10       |
| rs4532967   | 1735               | SNP            | G         | 2        | G/T         | 73.7/26.3   | 14/5   | 19       |
| rs4986894   | 4903               | SNP            | T         | 2        | T/C         | 52.9/47.1   | 64/57  | 121      |
| rs17885098  | 5099               | SNP            | C         | 1        | T           | 95.5        | 127    | 133      |
| rs7916649   | 17122              | SNP            | G         | 2        | G/A         | 65.2/34.8   | 30/16  | 46       |
| no rs#      | 17358              | SNP            | A         | 2        | A/C         | 65.0/25.0   | 13/5   | 20       |
| rs17878459  | 17460              | SNP            | G         | 2        | C/G         | 57.8/42.2   | 26/19  | 45       |
| rs12769205  | 17662              | SNP            | A         | 2        | A/G         | 57.8/42.2   | 26/19  | 45       |
| rs4244285   | 24154              | SNP            | G         | 2        | G/A         | 60.7/39.3   | 17/11  | 28       |
| rs12571421  | 24520              | SNP            | A         | 2        | A/G         | 57.7/42.3   | 71/52  | 123      |
| rs113833279 | 60084              | SNP            | G         | 2        | G/A         | 72.7/27.3   | 8_3    | 11       |
| no rs#      | 62664              | SNP            | T         | 2        | T/A         | 71.0/29.0   | 22/9   | 31       |
| rs4417205   | 62740              | SNP            | C         | 2        | C/G         | 55.8/44.2   | 58/46  | 104      |
| rs28399513  | 84936              | SNP            | T         | 2        | T/A         | 55.6/44.4   | 20/16  | 36       |
| rs3758580   | 85160              | SNP            | C         | 2        | C/T         | 63.3/36.7   | 19/11  | 30       |
| rs3758581   | 85161              | SNP            | A         | 1        | G           | 96.6        | 28     | 29       |

| <b>LL48</b> | <b>*17/*17</b> |     |   |   |   |      |     |     |
|-------------|----------------|-----|---|---|---|------|-----|-----|
| rs11188072  | 1599           | SNP | C | 1 | T | 99.8 | 461 | 462 |
| rs12248560  | 4195           | SNP | C | 1 | T | 99.5 | 378 | 380 |
| rs17885098  | 5099           | SNP | C | 1 | T | 98.3 | 529 | 538 |
| rs7916649   | 17122          | SNP | G | 1 | A | 99.8 | 886 | 888 |
| rs3758581   | 85161          | SNP | A | 1 | G | 99   | 670 | 677 |
| rs12268020  | 94909          | SNP | C | 1 | T | 94.6 | 123 | 130 |

| <b>LL49</b> | *17/*17            |                |           |          |             |             |        |          |
|-------------|--------------------|----------------|-----------|----------|-------------|-------------|--------|----------|
|             | Reference Position | Variation Type | Reference | Variants | Allele Vari | Frequencies | Counts | Coverage |
| rs11188072  | 1599               | SNP            | C         | 1        | T           | 100         | 40     | 40       |
| rs12248560  | 4195               | SNP            | C         | 1        | T           | 99.2        | 260    | 262      |
| rs17885098  | 5099               | SNP            | C         | 1        | T           | 96.9        | 246    | 254      |
| rs7916649   | 17122              | SNP            | G         | 1        | A           | 98.8        | 84     | 85       |
| rs3758581   | 22098              | SNP            | A         | 2        | A/G         | 72.7/27.3   | 8_3    | 11       |
| no rs#      | 84611              | SNP            | T         | 2        | T/C         | 61.5/38.5   | 8_5    | 13       |
| rs3758581   | 85161              | SNP            | A         | 1        | G           | 100         | 68     | 68       |
| rs12268020  | 94909              | SNP            | C         | 1        | T           | 87.9        | 29     | 33       |

| <b>LL53</b> | *17/*17            |                |           |          |             |             |        |          |
|-------------|--------------------|----------------|-----------|----------|-------------|-------------|--------|----------|
|             | Reference Position | Variation Type | Reference | Variants | Allele Vari | Frequencies | Counts | Coverage |
| rs12248560  | 4195               | SNP            | C         | 1        | T           | 98.8        | 158    | 160      |
| rs17885098  | 5099               | SNP            | C         | 1        | T           | 94.2        | 131    | 139      |
| rs7916649   | 17122              | SNP            | G         | 1        | A           | 100         | 31     | 31       |
| rs3758581   | 85161              | SNP            | A         | 1        | G           | 100         | 22     | 22       |
